# Supplementary material
Source: publisher site journal article supplement (https://www.dovepress.com/get_supplementary_file.php?f=232230.docx)
Supplement: Supplementary file 1 [file get_supplementary_file.php]

**SUPPLEMENTARY INFORMATION**

**Correlative *Ex Situ* and Liquid-Cell TEM Observation of Bacterial Cell Membrane Damage Induced by Rough Surface Topology**

*David J. Banner*1*, Emre Firlar1,2, Justas Jakobonis1, Yusuf Baggia*1*, Jodi K. Osborn1, Reza Shahbazian-Yassar2, Constantine M. Megaridis2 and Tolou Shokuhfar1,2,**

1Department of Bioengineering, University of Illinois at Chicago, 851 Morgan St., Chicago, IL, 60607, USA

2Department of Mechanical and Industrial Engineering, University of Illinois at Chicago, 842 West Taylor St., Chicago, IL, 60607, USA

*Liquid TEM Imaging*

Bacteria have been shown to be viable within liquid TEM by both fluorescent live/dead staining and by observation of binary fission.1–7 The pressure within the graphene liquid cell (GLC) is dependent on the sample thickness due to the small volume and Van der Waals interactions, with smaller sample sizes inducing higher pressures.8–10 However, forlarger samples, such as *E. coli* bacteria, the increase in pressure might be at most several atmospheres.8–10 This change in pressure is several orders of magnitude lower than that required to kill *E. coli.*11 The increase in temperature due to the electron beam is at most several degrees C.12 Graphene itself diffuses the electron beam and absorbs free radicals to further mitigate the effects of the electron beam.13 Further, electron-beam exposure sufficient to produce significant free radical doses can produce gaseous bubbles due to the release of free hydrogen and oxygen, which was not observed in our tests.12 While previous studies have proposed that free radical generation may lower the pH, these effects may be decreased by the free radical absorption of the graphene. Further, here the pH may be buffered by the phosphate buffered saline (PBS) medium.14

Other works have observed the death of bacteria in bulk samples due to sample exposure to a lower-energy incident electron beam, similar to the one used here.15 However, the energy of the incident electron beam is not reflective of the electron dose absorbed by the GLC sample, and cannot be compared to the electron dose of a bulk sample.16 Electron beams induce release of secondary electrons, which reflect within the sample before escaping.17 This reflection of secondary electrons produces most of the damage experienced by the sample, while high-energy TEM electrons pass through the sample inducing minimal sample damage.17 In GLC, electrons pass through a single bacterium in a thin liquid medium, which severely reduces reflection of secondary electrons as compared to a bulk sample. The electron dose experienced by the sample in GLC may more accurately be modeled as

where S the stopping power of the sample, I the electron beam current, and a the radius of the electron beam.16 This indicates that the electron dose the bacteria experience within the TEM is far lower than in bulk samples due to the far lower stopping power of thin samples.

_________________________

* E-mail: Tolou@uic.edu

While some researchers have reported death of eukaryotic organisms, such as yeast, in liquid TEM imaging, a number of differences between the prokaryotic bacteria and eukaryotic organisms may explain the observed survival of bacteria within GLC.5,18 Eukaryotes are larger, on the order of 4μm to 20μm diameter for yeast, but more frequently vary from 10μm to 100μm in diameter.19,20 *E. coli* are rod shaped and typically between 500nm to 1μm in length, but only 250nm to 500nm in diameter.21 The larger eukaryotic sizes may lead to a significant increase in the generation of secondary electrons due to an increased stopping power and reflection of electrons within the larger sample.22 Additionally, eukaryotes contain a single dense nucleus containing the nuclei acid, which may create significant electron beam absorption as compared to the disperse nucleic acid in prokaryotic organisms.20 A number of additional factors, such as the advanced cytoskeleton and complex organelles present in eukaryotes, also prevent direct comparison of eukaryotes to prokaryotic bacteria.20 Regardless of the mechanistic difference between bacteria and yeast, numerous studies have experimentally verified the viability of bacteria within liquid TEM.1,2,4–7,13


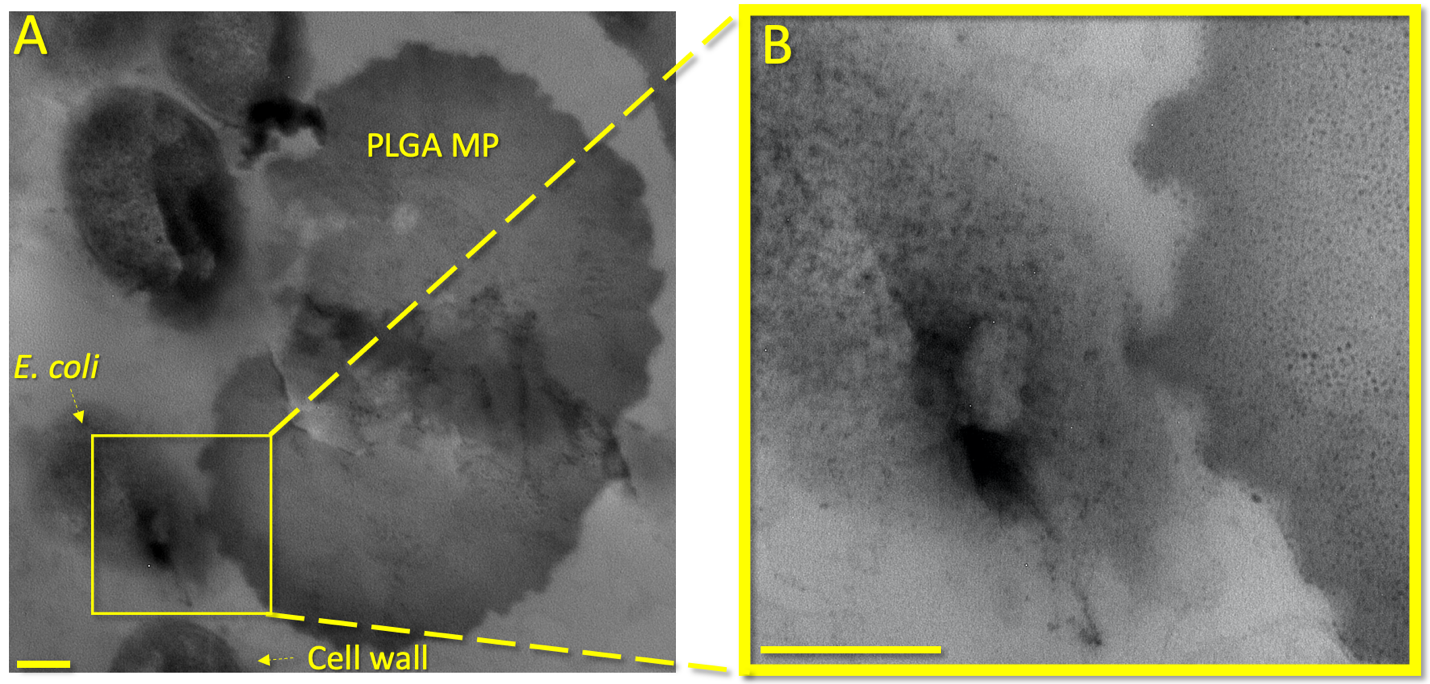


**Figure S1**. Unaltered (non-colorized) version of Figure 2. Bacterial death is induced by rough MP topography. In **A** and **B**, low and high magnification images show the surface interaction between an *E. coli* bacterium and a rough PLGA particle plasma-etched for 2 minutes. A sharp protrusion on the PLGA particle appears to have penetrated the *E. coli* bacterium cell wall. The area bracketed in **A** is shown at higher magnification in **B**. The scale bars in **A** and **B** are 200 nm.


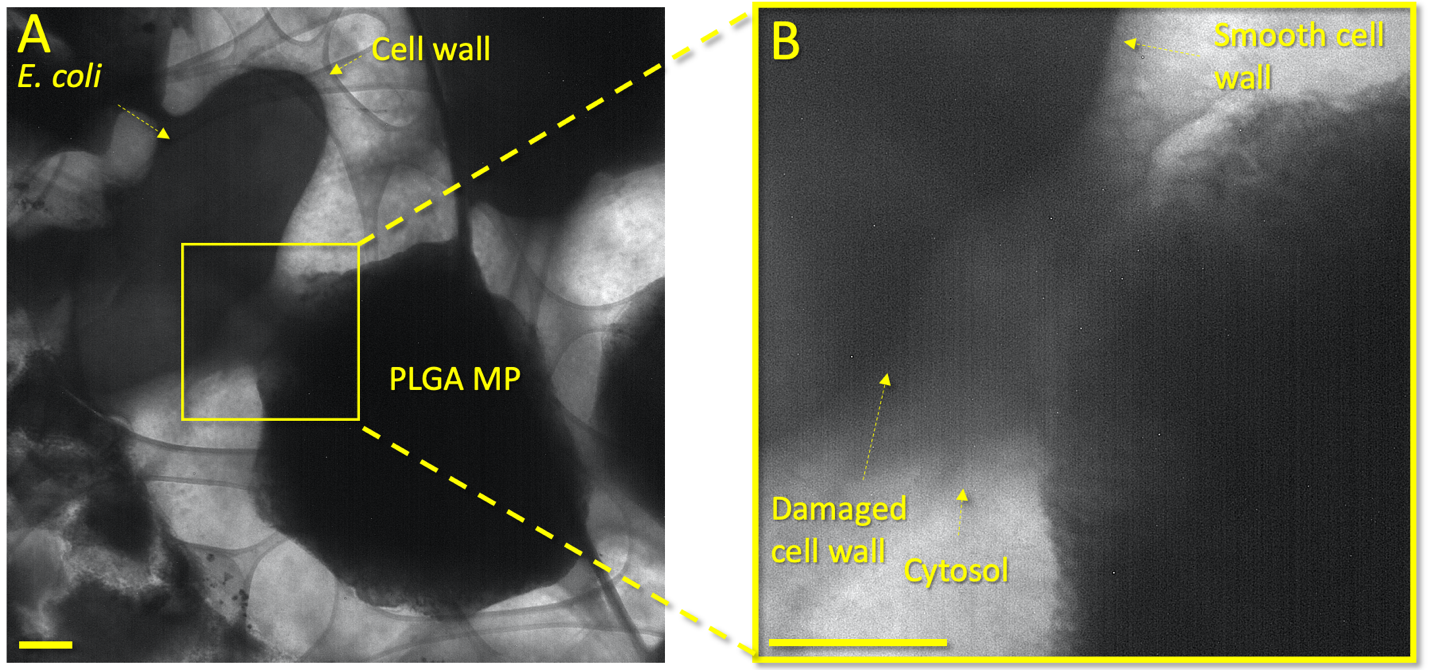


**Figure S2**. Unaltered (non-colorized) version of Figure 3. GLC encapsulation of *E. coli* and PLGA MPs shows localized damage to the cell wall of a bacterium. In **A**, a lower-magnification image shows the *E. coli* particle and the PLGA MP. In **B**, a higher-magnification image shows the PLGA particle and bacterium in close proximity. The cell wall proximal to the PLGA particle reveals damage with a shape similar to the adjacent wall. A high contrast liquid indicates the cytosol of the bacterium, which confirms its death. The cytosol has a higher contrast than the PBS medium due to the protein, glycans, and other bacterial components within the cytosol. Other areas of the *E. coli* cell wall are smooth and show no damage or degradation. The scale bars in **A** and **B** are 200 nm.

**REFERENCES**

1. Mohanty N, Fahrenholtz M, Nagaraja A, Boyle D, Berry V. Impermeable graphenic encasement of bacteria. *Nano Lett*. 2011;11(3):1270-1275.

2. Woehl TJ, Kashyap S, Firlar E, et al. Correlative electron and fluorescence microscopy of magnetotactic bacteria in liquid: Toward in vivo imaging. *Sci Rep*. 2014;4:6854.

3. Firlar E, Ouy M, Bogdanowicz A, et al. Investigation of the magnetosome biomineralization in magnetotactic bacteria using graphene liquid cell – transmission electron microscopy. *Nanoscale* 2019;11(2):698-705.

4. Kennedy E, Nelson EM, Tanaka T, Damiano J, Timp G. Live Bacterial Physiology Visualized with 5 nm Resolution Using Scanning Transmission Electron Microscopy. *ACS Nano*. 2016;10(2):2669-2677.

5. Kennedy E, Nelson EM, Damiano J, Timp G. Gene Expression in Electron-Beam-Irradiated Bacteria in Reply to “Live Cell Electron Microscopy Is Probably Impossible.” *ACS Nano*. 2017;11(1):3-7.

6. Wang Y, Chen X, Cao H, Deng C, Cao X, Wang P. A Structural Study of Escherichia coli Cells Using an In Situ Liquid Chamber TEM Technology. *J Anal Methods Chem*. 2015;2015:829302.

7. Firlar E, Ouy M, Bogdanowicz A, et al. Investigation of the magnetosome biomineralization in magnetotactic bacteria using graphene liquid cell-transmission electron microscopy. *Nanoscale* 2019;11(2):698-705.

8. Ghodsi SM, Megaridis CM, Shahbazian‐Yassar R, Shokuhfar T. Advances in Graphene‐Based Liquid Cell Electron Microscopy: Working Principles, Opportunities, and Challenges. *Small Methods* 2019;3:453001.

9. Shin D, Park JB, Kim YJ, et al. Growth dynamics and gas transport mechanism of nanobubbles in graphene liquid cells. *Nat Commun*. 2015;6:6068.

10. Khestanova E, Guinea F, Fumagalli L, Geim AK, Grigorieva I V. Universal shape and pressure inside bubbles appearing in van der Waals heterostructures. *Nat Commun*. 2016;7:12587.

11. Gänzle M, Liu Y. Mechanisms of pressure-mediated cell death and injury in Escherichia coli: From fundamentals to food applications. *Front Microbiol*. 2015;6:599.

12. Grogan JM, Schneider NM, Ross FM, Bau HH. Bubble and pattern formation in liquid induced by an electron beam. *Nano Lett*. 2014;14(1):359-364.

13. Berry V. Impermeability of graphene and its applications. *Carbon N Y*. 2013;62:1-10.

14. Wang X, Yang J, Andrei CM, Soleymani L, Grandfield K. Biomineralization of calcium phosphate revealed by in situ liquid-phase electron microscopy. *Commun Chem*. 2018;80:2018.

15. Levanduski L, Jaczynski J. Increased resistance of Escherichia coli O157:H7 to electron beam following repetitive irradiation at sub-lethal doses. *Int J Food Microbiol*. 2008;121(3):328-334.

16. Schneider NM, Norton MM, Mendel BJ, Grogan JM, Ross FM, Bau HH. Electron-Water interactions and implications for liquid cell electron microscopy. *J Phys Chem C*. 2014;118(38):22373-22382.

17. Egerton RF. Control of radiation damage in the TEM. *Ultramicroscopy*. 2013;127:100-108.

18. De Jonge N, Peckys DB. Live Cell Electron Microscopy Is Probably Impossible. *ACS Nano*. 2016;10(10):9061-9063.

19. Walker K, Skelton H, Smith K. Cutaneous lesions showing giant yeast forms of Blastomyces dermatitidis. *J Cutan Pathol*. 2002;29(10):616-618.

20. Reece, Urry, Cain, Wasserman, Minorsky, Jackson. *Campbell Biology*.; 2014.

21. Reshes G, Vanounou S, Fishov I, Feingold M. Cell shape dynamics in Escherichia coli. *Biophys J*. 2008;94(1):251-264.

22. Egerton RF. Mechanisms of radiation damage in beam-sensitive specimens, for TEM accelerating voltages between 10 and 300 kV. *Microsc Res Tech*. 2012;75(11):1550-1556.
